# Supplementary material
Source: publisher figshare collection journal article supplement (https://acs.figshare.com/ndownloader/files/4530169)
Supplement: Supplementary file 1 [file 4530169]

## Supporting Information

### Compatibilization by Homopolymer: Significant Improvements in Modulus and Tensile Strength of PPC/PMMA Blends by Addition of Small Amount of PVAc

Yongjin Li\* and Hiroshi Shimizu

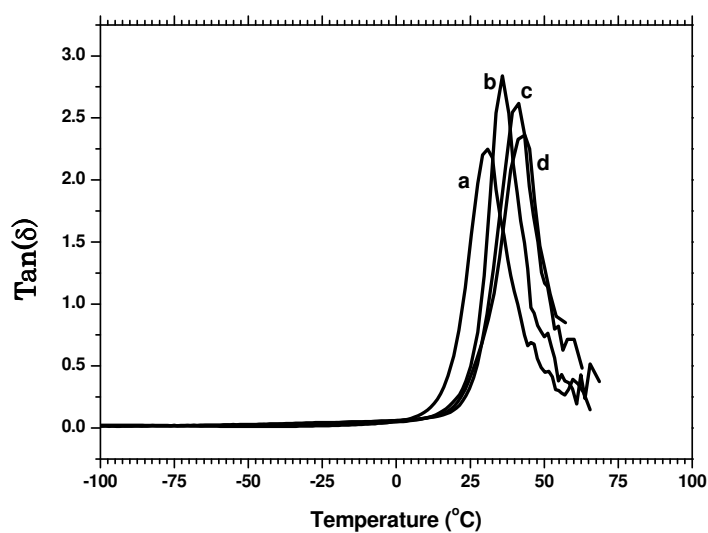

Figure S1. Tan ( $\delta$ ) as a function of temperature for PPC/PVAc blends (a) pure PPC, (b) PPC/PVAc=70/30, (c) PPC/PVAc=30/70, and (d) pure PVAc.

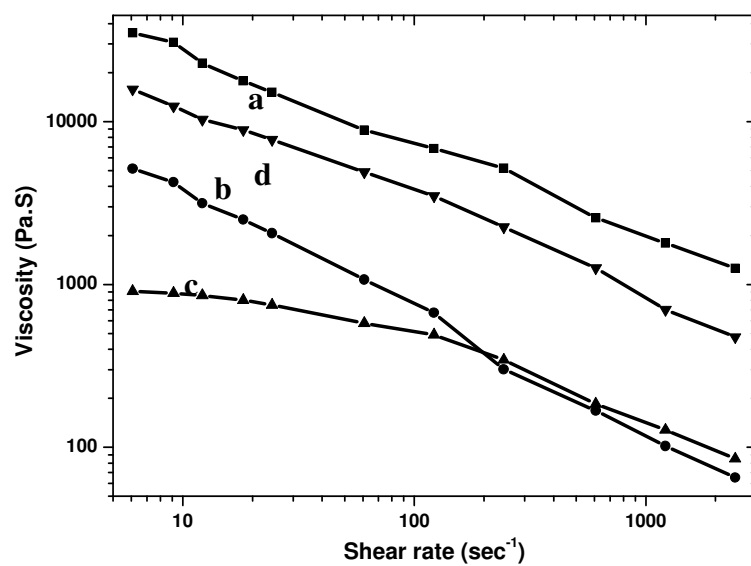

Figure S2. Melt viscosity of (a) PMMA, (b) PPC, (c) PVAc, and (d) PMMA/PVAc=70/30 blend at 155°C by capillary rheometer.

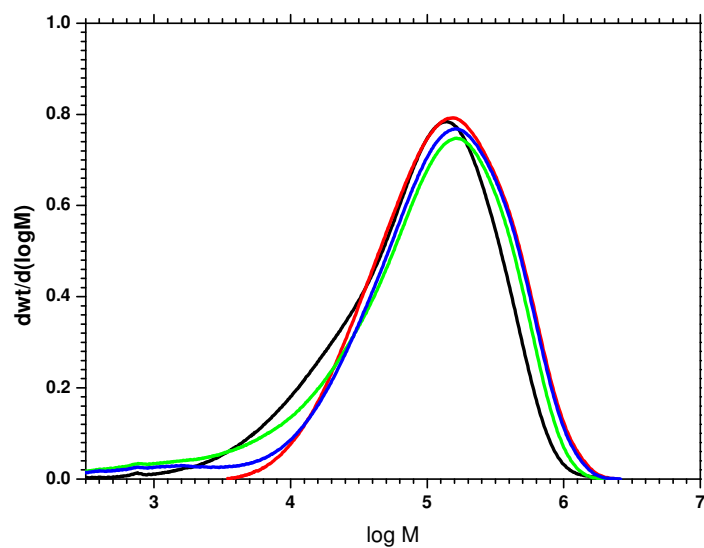

Figure S3. Molecular weight distribution of PPC (black line), PVAc (red line), PPC/PVAc=30/70 (green line), and PPC/PVAc70/30 (blue line) after melt mixing at 155°C by GPC.
